# Supplementary material for: A Variety of Mouse PYHIN Proteins Restrict Murine and Human Retroviruses
Source: MDPI journal article supplement (doi:10.3390/v16040493), 2024-03-23
Supplement: s1 [file s1]

# **A Variety of Mouse PYHIN Proteins Restrict Murine and Human Retroviruses**

Sümeyye Erdemci-Evin, Matteo Bosso, Veronika Krchlikova, Wibke Bayer, Kerstin Regensburger, Martha Mayer, Ulf Dittmer, Daniel Sauter, Dorota Kmiec, Frank Kirchhoff

**Supplementary material**

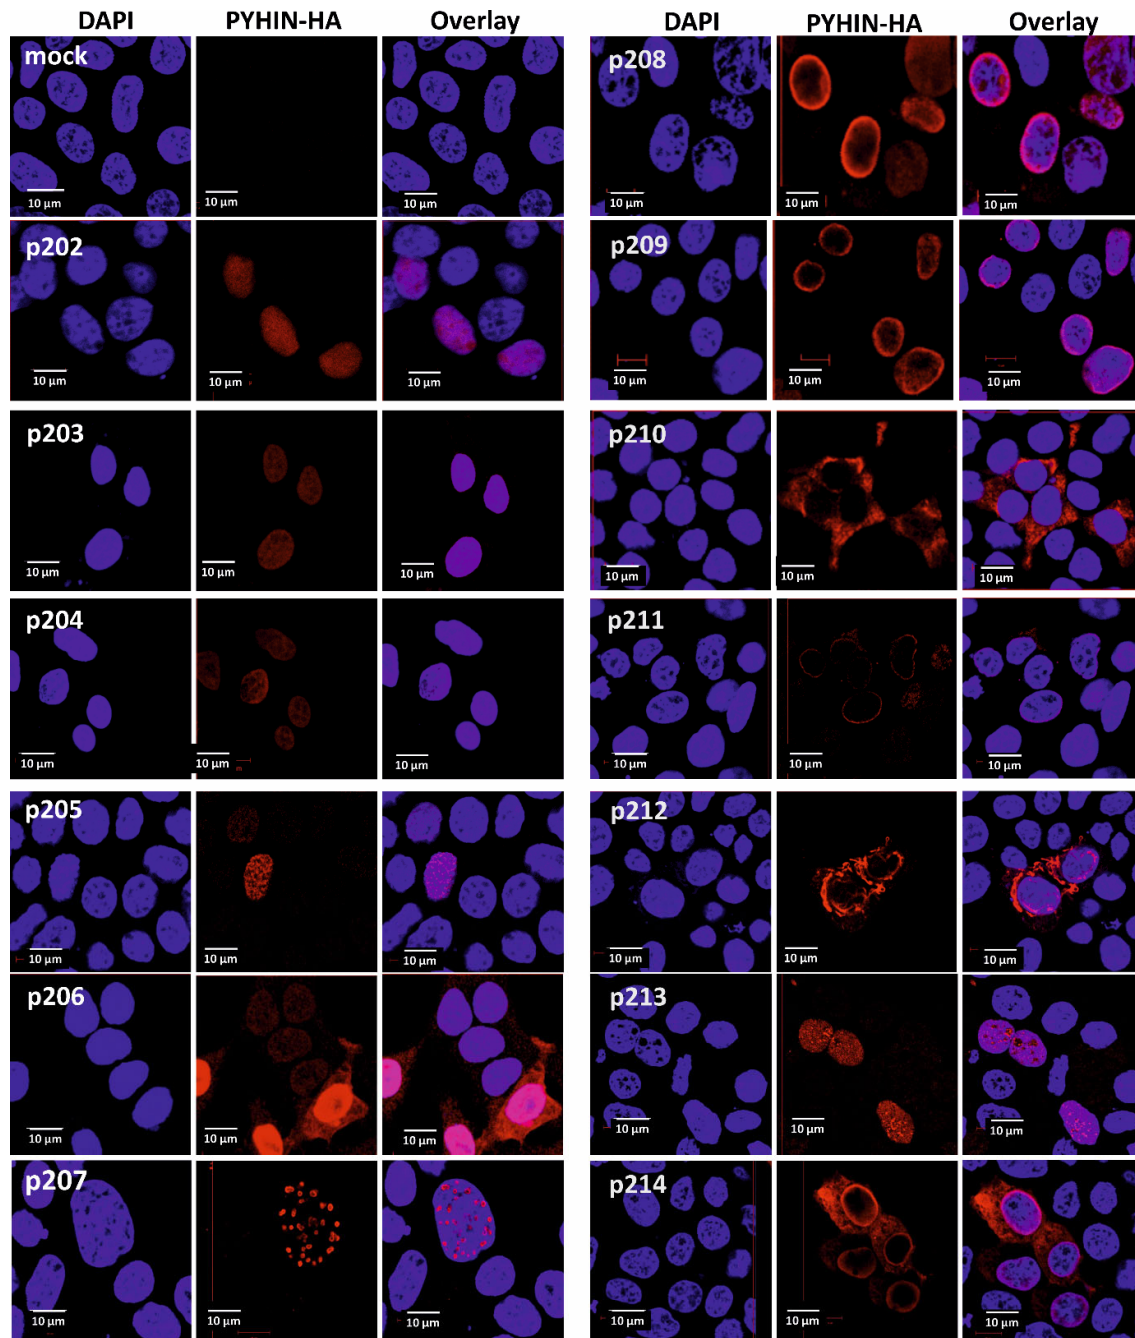

**Supplementary Figure S1. Subcellular localization of murine PYHIN proteins.** HEK293T cells were transfected with expression vectors for murine PYHIN proteins with a C-terminal HA-tag. 40h post-transfection, cells were fixed and stained with antibody targeting HA-tag to visualize PYHIN proteins (red) and DAPI to image the nuclei (blue).

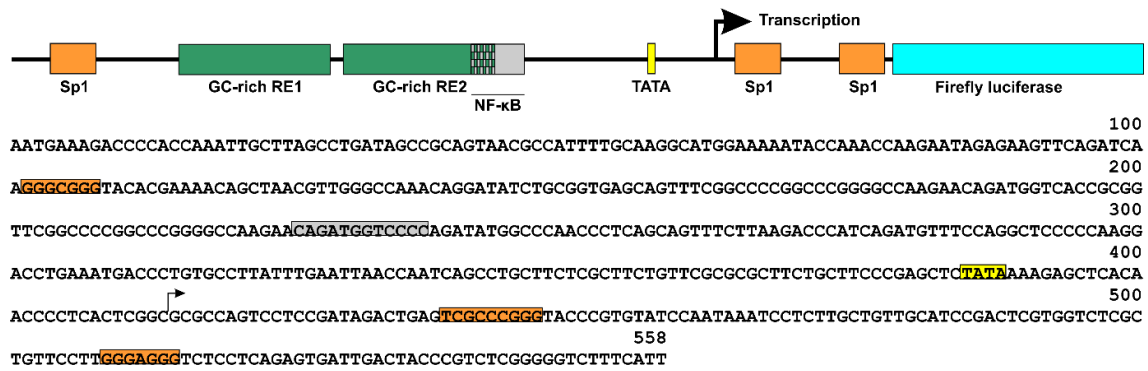

**Supplementary Figure S2.** Schematic representation of the F-MLV LTR luciferase construct and the viral LTR. Sp1/Sp3 and NF-κB binding sites were identified using the PROMO prediction tool and are indicated in the schematic and the LTR sequence.
